# Supplementary material for: Bioinspired preparation of polydopamine microcapsule for multienzyme system construction
Source: Royal Society of Chemistry journal article supplement (doi:10.1039/c0gc00432d), 2010-12-06
Supplement: c0gc00432d.pdf [file c0gc00432d.pdf]

## Supplementary information

# Bioinspired and polydopamine-enabled multienzyme system construction

By *Lei Zhang*<sup>1,2</sup>, *Jiafu Shi*<sup>1,2</sup>, *Zhongyi Jiang*<sup>1,2\*</sup>, *Yanjun Jiang*<sup>3</sup>, *Shizhang Qiao*<sup>4</sup>,  
*Jian Li*<sup>1</sup>, *Rui Wang*<sup>1</sup>, *Ruijie Meng*<sup>1</sup>, *Yuanyuan Zhu*<sup>1</sup> and *Yang Zheng*<sup>1</sup>

[\*] Prof. Zhongyi Jiang Corresponding-Author,

1. Key Laboratory for Green Technology of Ministry of Education, School of Chemical Engineering and Technology, Tianjin University, Tianjin 300072, China

2. National Key Laboratory of Biochemical Engineering, Institute of Process Engineering, Chinese Academy of Sciences, Beijing 100190, China

3. Department of Bioengineering, School of Chemical Engineering, Hebei University of Technology, Tianjin 300130, China

4. ARC Centre of Excellence for Functional Nanomaterials, Australian Institute for Bioengineering and Nanotechnology, The University of Queensland, Qld 4072, Australia

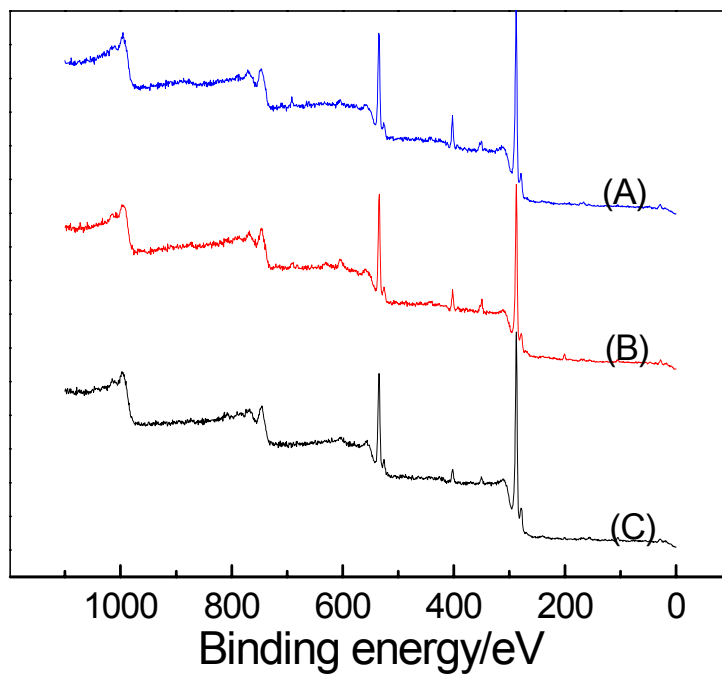

Fig.S1 XPS spectra of the PDA microcapsule containing  $\alpha$ -amylase(A),  $\beta$ -amylase(B),  
glucosidase (C).
